# Supplementary material for: Conformation transitions of the polypeptide-binding pocket support an active substrate release from Hsp70s
Source: PubMed Central journal article supplement (PMC5662698; doi:10.1038/s41467-017-01310-z), 2017-10-31
Supplement: 41467_2017_1310_MOESM1_ESM.pdf [file 41467_2017_1310_MOESM1_ESM.pdf]

# Supplementary Figure 1

|          |   |                                                              |       |        |    |
|----------|---|--------------------------------------------------------------|-------|--------|----|
|          |   |                                                              | 1     | →      |    |
| hBiP     | 1 | -----MKLSLVAAMLLLLSAARAEEDKK                                 | EDVGT | VVGIDL | 35 |
| dBiP     | 1 | -----MKLCILLAVVAFVGLSLGEEKKEKDKELGTVIGIDL                    |       |        | 36 |
| gBiP     | 1 | -----MARSWRASGSLVALAIVLSCFFAISIAKEEAAKLGTVIGIDL              |       |        | 43 |
| Kar2     | 1 | ---MFFNRLSAGKLLVPLSVVLYALFVVILPLQNSFHSSNVLVRGADDVENYGTVIGIDL |       |        | 57 |
| hHsp70   | 1 | -----MAKAAAIGIDL                                             |       |        | 11 |
| dHsp70   | 1 | -----MPAIGIDL                                                |       |        | 8  |
| gHsp70   | 1 | -----MAGKSEGSAIGIDL                                          |       |        | 14 |
| bHsc70   | 1 | -----MSKGPVAVGIDL                                            |       |        | 11 |
| Ssa1     | 1 | -----MSKGPVAVGIDL                                            |       |        | 11 |
| hmtHsp70 | 1 | MISASRAAAARLVGAAASRGPTAARHQDSWNGLSHEAFRLVSRDYASEAIKGVAVGIDL  |       |        | 60 |
| Ssc1     | 1 | -----MLAAKNIILNRSSLSSSFRIATRLQSTKVQGSVIGIDL                  |       |        | 37 |
| eDnaK    | 1 | -----MGKIIIGIDL                                              |       |        | 9  |
| dsDnaK   | 1 | -----MGKIIIGIDL                                              |       |        | 9  |
| abDnaK   | 1 | -----MAKIIIGIDL                                              |       |        | 9  |
| laDnaK   | 1 | -----MSKIIIGIDL                                              |       |        | 9  |
| vhDnaK   | 1 | -----MSKIIIGIDL                                              |       |        | 9  |

|          |    |                                                              |   |   |   |   |   |  |     |
|----------|----|--------------------------------------------------------------|---|---|---|---|---|--|-----|
|          |    | 2                                                            | 3 | 4 | 5 | A | C |  |     |
|          |    | →                                                            | → | → | → | ▭ | ▭ |  |     |
| hBiP     | 36 | GTTTSCVGVFKNGRVEIIANDQGNRITPSYVAFTPEGERLIGDAAKNQLTNPENTVFDA  |   |   |   |   |   |  | 95  |
| dBiP     | 37 | GTTTSCVGVYKNGRVEIIANDQGNRITPSYVAFTADGERLIGDAAKNQLTNPENTVFDA  |   |   |   |   |   |  | 96  |
| gBiP     | 44 | GTTTSCVGVYKNGHVEIIANDQGNRITPSVVAFT-DSERLIGEAAKNQAAVNAERTIFDV |   |   |   |   |   |  | 102 |
| Kar2     | 58 | GTTTSCVAVMKNKTEILANEQGNRITPSYVAFT-DDERLIGDAAKNQVAANPQNTIFDI  |   |   |   |   |   |  | 116 |
| hHsp70   | 12 | GTTTSCVGVFQHGKVEIIANDQGNRTTPSYVAFT-DTERLIGDAAKNQVALNPQNTVFDA |   |   |   |   |   |  | 70  |
| dHsp70   | 9  | GTTTSCVGVYQHGKVEIIANDQGNRTTPSYVAFT-DSERLIGDPAKNQVAMNPRNTVFDA |   |   |   |   |   |  | 67  |
| gHsp70   | 15 | GTTTSCVGVWQHDRVEIIANDQGNRTTPSYVAFT-DSERLIGDAAKNQVAMNPTNTVFDA |   |   |   |   |   |  | 73  |
| bHsc70   | 12 | GTTTSCVGVFQHGKVEIIANDQGNRTTPSYVAFT-DTERLIGDAAKNQVAMNPTNTVFDA |   |   |   |   |   |  | 70  |
| Ssa1     | 12 | GTTTSCVGVFQHGKVEIIANDQGNRTTPSYVAFT-DTERLIGDAAKNQVAMNPTNTVFDA |   |   |   |   |   |  | 70  |
| hmtHsp70 | 61 | GTTNSCVAVMEGKRAKVLNAEGARTTPSVVAFTADGERLVGMPAKRQAVTNPNTFYAT   |   |   |   |   |   |  | 120 |
| Ssc1     | 38 | GTTNSAVAIMEGKVPKIIENAEGSRTTPSVVAFTKEGERLVGIPAKRQAVVNPENTLFAT |   |   |   |   |   |  | 97  |
| eDnaK    | 10 | GTTNSCVAIMDGTTPRVLNAEGDRTPSIIAYTQDGETLVGQPAKRQAVTNPQNTLFAI   |   |   |   |   |   |  | 69  |
| dsDnaK   | 10 | GTTNSCVSVMEGNEPVVIPNSEGKRTTPSIVAFVNGERKVGDPAKRQAITNPKTIFSI   |   |   |   |   |   |  | 69  |
| abDnaK   | 10 | GTTNSCVAVLEGDKVKVIEAEGARTTPSIIAY-KDGEILVQSAKRQAVTNPKNLFAI    |   |   |   |   |   |  | 68  |
| laDnaK   | 10 | GTTNSAVAVLEGGEAKIIPNPEGARTTPSVVGF-KNGERQVGEVAKRAAITNP-NTVISI |   |   |   |   |   |  | 68  |
| vhDnaK   | 10 | GTTNSCVSVMEGGEAVVIPNPEGNRTTPSVVAF-KNGERQVGEVAKRQAITNP-NTIQSV |   |   |   |   |   |  | 68  |

|          |     |                                                                |   |   |   |   |   |     |
|----------|-----|----------------------------------------------------------------|---|---|---|---|---|-----|
|          |     | D                                                              | 7 | 8 | 9 | E |   |     |
|          |     | ▭                                                              | ▭ | → | → | → | ▭ |     |
| hBiP     | 96  | KRLIGRTWNDPSVQODIKFLPFKVVVEKKT-KPYIQVDIGGGQTKTFAPEEISAMVLTRMK  |   |   |   |   |   | 154 |
| dBiP     | 97  | KRLIGREWSDTNVQHDIKFFPFKVVVEKNS-KPHISVDTSQG-AKVFAPPEEISAMVLGKMK |   |   |   |   |   | 154 |
| gBiP     | 103 | KRLIGRKFEDKEVQRDMKLVPIKIVNKDG-KPYIQVKIKDGETKVFSPPEEISAMVLTRMK  |   |   |   |   |   | 161 |
| Kar2     | 117 | KRLIGLKYNDRSVQDKIKHLPFNVNKDG-KPAVEVSVK-GEKKVFTPEEISGMILGKMK    |   |   |   |   |   | 174 |
| hHsp70   | 71  | KRLIGRKFDPVQSDMKHWPQVINDGD-KPKVQVSYK-GETKAFYPEEISSMVLTRMK      |   |   |   |   |   | 128 |
| dHsp70   | 68  | KRLIGRKYDDPKIAEDMKHWPQVVSDDG-KPKIGVEYK-GESKRFAPPEEISSMVLTRMK   |   |   |   |   |   | 125 |
| gHsp70   | 74  | KRLIGRRFSDASVQSDMKLWPFVTPGAGDKPMITVAYK-GEDKMFAEEEISSMVLTRMK    |   |   |   |   |   | 132 |
| bHsc70   | 71  | KRLIGRRFDDAVVQSDMKHWPFMVNDAG-RPKVQVEYK-GETKSFYPEEVSSMVLTRMK    |   |   |   |   |   | 128 |
| Ssa1     | 71  | KRLIGRRFDDAVVQSDMKHWPFMVNDAG-RPKVQVEYK-GETKSFYPEEVSSMVLTRMK    |   |   |   |   |   | 128 |
| hmtHsp70 | 121 | KRLIGRRYDPEVQDKIKNVPFKIVRASN-GDAWVEAHG----KLYSPQIGAFVLMKMK     |   |   |   |   |   | 175 |
| Ssc1     | 98  | KRLIGRRFEDAQVQDKIKVPIKIVKHSN-GDAWVEARG----QTYSPAQIGGFVLMKMK    |   |   |   |   |   | 152 |
| eDnaK    | 70  | KRLIGRRFQDEEVQRDVSIMPFKIIAADN-GDAWVEVKG----QKMAPPQISAEVLKMK    |   |   |   |   |   | 124 |
| dsDnaK   | 70  | KRFMGETFD--QVSKEVNRVPIKVVVRGDN-NTPRVEIDD----RKYSPEEISAMTLQKMK  |   |   |   |   |   | 124 |
| abDnaK   | 69  | KRLIGRRYEDQAVQDKIGLVPYKIIKADN-GDAWVEVND----KKLAPQISAEILKMK     |   |   |   |   |   | 123 |
| laDnaK   | 69  | KRHMGTDYK-----ETIEG----KDYSPEEISAILQYLK                        |   |   |   |   |   | 99  |
| vhDnaK   | 69  | KRHMGTDYK-----VKIED----KEFTPEQVSAIILQHIK                       |   |   |   |   |   | 99  |

# Supplementary Figure 1

|          |     |                                                                     |     |
|----------|-----|---------------------------------------------------------------------|-----|
|          |     |                                                                     |     |
| hBiP     | 155 | <b>ETAEAYLGKKVTHAVVTVPAYFNDAQRQATKDAGTIAGLNVMRIINEPTAAAIAYGLDKR</b> | 214 |
| dBiP     | 155 | ETAEAYLGKKVTHAVVTVPAYFNDAQRQATKDAGVIAGLQVMRIINEPTAAAIAYGLDKK        | 214 |
| gBiP     | 162 | ETAEAYLGKKIKDAVTVPAYFNDAQRQATKDAGIIAGLNVARIINEPTAAAIAYGLDKK         | 221 |
| Kar2     | 175 | QIAEDYLGTKVTHAVVTVPAYFNDAQRQATKDAGTIAGLNVLRIVNEPTAAAIAYGLDKS        | 234 |
| hHsp70   | 129 | EIAEAYLGYPVTVNAVITVPAYFNDSQRQATKDAGVIAGLNVLRINEPTAAAIAYGLDRT        | 188 |
| dHsp70   | 126 | ETAEAYLGESITDAVITVPAYFNDSQRQATKDAGHIAGLNVLRINEPTAAALAYGLDKN         | 185 |
| gHsp70   | 133 | ETAEAYLGSSVKNGVVTVPAYFNDSQRQATKDAGVIAGLNVMRIINEPTAAAIAYGLDKK        | 192 |
| bHsc70   | 129 | EIAEAYLGKTVTNAVTVPAYFNDSQRQATKDAGTIAGLNVLRINEPTAATIAYGLDKK          | 188 |
| Ssa1     | 129 | EIAEAYLGKTVTNAVTVPAYFNDSQRQATKDAGTIAGLNVLRINEPTAATIAYGLDKK          | 188 |
| hmtHsp70 | 176 | ETAENYLGRYAKNAVITVPAYFNDSQRQATKDAGQISGLNVLRVINEPTAAALAYGLDKS        | 235 |
| Ssc1     | 153 | ETAEAYLGKPVKNVAVTVPAYFNDSQRQATKDAGQIVGLNVLRVINEPTAAALAYGLEKS        | 212 |
| eDnaK    | 125 | KTAEDYLGEVTEAVITVPAYFNDAQRQATKDAGRIGLEVKRIINEPTAAALAYGLDKG          | 184 |
| dsDnaK   | 125 | KTAEDYLGQEVTEAVTVPAYFSDSQRQATKEAGEIAGLKVRRIINEPTAASLAYGLDKM         | 184 |
| abDnaK   | 124 | KTAEDYLGETVTEAVITVPAYFNDAQRQATKDAGKIAGLDVKRIINEPTAALAFGMDKK         | 183 |
| laDnaK   | 100 | GYAEDYLGETVDKAVITVPAYFNDAQRQATKDAGKIAGLEVERINEPTAAALAYGMDKT         | 159 |
| vhDnaK   | 100 | SYAEDYIGETVEKAVITVPAYFNDAERQATKDAGKIAGLEVERINEPTAAALAYGIDKD         | 159 |

|          |     |                                                                      |     |
|----------|-----|----------------------------------------------------------------------|-----|
|          |     |                                                                      |     |
| hBiP     | 215 | <b>E---GEKNILVFDLGGGTFDVSLLTI---DNG-VFEVVATNGDTHLGGEDFDQRMVMEHFI</b> | 267 |
| dBiP     | 215 | E---GEKNVLVFDLGGGTFDVSLLTI---DNG-VFEVVATNGDTHLGGEDFDQRMVDHFI         | 267 |
| gBiP     | 222 | G---GEKNILVFDLGGGTFDVSILTI---DNG-VFEVLSTNGDTHLGGEDFDQRI MEYFI        | 274 |
| Kar2     | 235 | D---KEHQIIVYDLGGGTFDVSLLSI---ENG-VFEVQATSGDTHLGGEDFDYKIVRQLI         | 287 |
| hHsp70   | 189 | GK--GERNVLIFDLGGGTFDVSILTI---DDG-IFEVKATAGDTHLGGEDFDNRLVNHFV         | 242 |
| dHsp70   | 186 | LK--GERNVLIFDLGGGTFDVSILTI---DEGSLFEVVRSTAGDTHLGGEDFDNRLVTHLA        | 240 |
| gHsp70   | 193 | ASSVGEKNVLIFDLGGGTFDVSLLTI---EEG-IFEVKATAGDTHLGGEDFDNRMVNHFV         | 248 |
| bHsc70   | 189 | VG--AERNVLIFDLGGGTFDVSILTI---EDG-IFEVKSTAGDTHLGGEDFDNRMVNHFI         | 242 |
| Ssa1     | 189 | VG--AERNVLIFDLGGGTFDVSILTI---EDG-IFEVKSTAGDTHLGGEDFDNRMVNHFI         | 242 |
| hmtHsp70 | 236 | E---DKVIAVYDLGGGTFDISILEI---QKG-VFEVKSTNGDTHLGGEDFDQALLRHIV          | 287 |
| Ssc1     | 213 | D---SKVAVFDLGGGTFDISILDI---DNG-VFEVKSTNGDTHLGGEDFDIYLLREIV           | 264 |
| eDnaK    | 185 | T---GNRTIAVYDLGGGTFDISIIEIDEVDGEKTFEVLATNGDTHLGGEDFDSRLINYLIV        | 241 |
| dsDnaK   | 185 | D---RDMKIAVFDLGGGTFDISILEL---GDG-VFEVKSTGDTHLGGDDFDQVIIDWLA          | 237 |
| abDnaK   | 184 | E---GDRKVAVYDLGGGTFDVSIIIEIADLDGDDQIEVLSSTNGDTHLGGEDFDNALIEYLV       | 240 |
| laDnaK   | 160 | D---KDQTIIVFDLGGGTFDVSILEL---GDG-VFEVHSTAGDNHLGGDDFDQKIIDYLV         | 212 |
| vhDnaK   | 160 | D---QDQTIIVYDLGGGTFDVSILDI---GDG-TFEVVSTAGDNRLGGDDFDEVIINHMV         | 212 |

|          |     |                                                                    |     |
|----------|-----|--------------------------------------------------------------------|-----|
|          |     |                                                                    |     |
| hBiP     | 268 | <b>KLYKKKTGKDVKDNRAVQKLRREVEKAKRALSSQHQAARIEIESFYE---GEDFSETLT</b> | 323 |
| dBiP     | 268 | KLYKKKKGKDIRKDNRAVQKLRREVEKAKRALSGSHQVRVRIEIESFFE---GDDFSETLT      | 323 |
| gBiP     | 275 | KLIKKKHGKDISKDNRALGKLRREAERAKRALSSQHQRVEIESLFD---GVDFSEPLT         | 330 |
| Kar2     | 288 | KAFKKKHGIDVSDNNKALAKLKREAERAKRALSSQMSSTRIEIDSFVD---GIDLSETLT       | 343 |
| hHsp70   | 243 | EEFKRKHKKDISQNKRAVRLRTACERAKRTLSSSTQASLEIDSLFE---GIDFYTSIT         | 298 |
| dHsp70   | 241 | DEFKRYKLDLRNPRALRRLRTAERAKRTLSSSTEATIEIDALFE---GQDFYTKVS           | 296 |
| gHsp70   | 249 | QEFKRKHKKDISGNPRALRRLRTSCERAKRTLSSSTAQTIEIDSLYE---GIDFYTSIT        | 304 |
| bHsc70   | 243 | AEFKRKHKKDISENKRAVRLRTACERAKRTLSSSTQASIEIDSLYE---GIDFYTSIT         | 298 |
| Ssa1     | 243 | AEFKRKHKKDISENKRAVRLRTACERAKRTLSSSTQASIEIDSLYE---GIDFYTSIT         | 298 |
| hmtHsp70 | 288 | KEFKRETGVDLTKDNMALQVRVREAAEKAKCELSSSVQTDINLPYLTMDSSGPKHLNMKLT      | 347 |
| Ssc1     | 265 | SRFKTETGIDLENDRAIQVIREAAEKAKIELSSSTVSTEINLPFITADASGPKHINMKFS       | 324 |
| eDnaK    | 242 | EEFKDQGDILRNDPLAMQRLKEAAEKAKIELSSAQQTDVNLPIYTADATGPKHMNIKVT        | 301 |
| dsDnaK   | 238 | DEFNSEEGIDLRKDPMALQRLKEAAEKAKIELSSSSQTEINLPYIMPVNGIPKHLVKTLS       | 297 |
| abDnaK   | 241 | EEFKKEQNVNLKNDPLALQRLKEAAEKAKIELSSSNATEINLPYITADATGPKHLVINVT       | 300 |
| laDnaK   | 213 | SEFKKENGIDLSQDKMALQRLKDAAEKAKKDLSGVMSTQISLPFITAGEAGPLHLEVNLT       | 272 |
| vhDnaK   | 213 | QEFKKENGIDLSKDKMATQRLKDAAEKAKKDLSGVSTQISLPFITAGEAGPLHLEMNLT        | 272 |

# Supplementary Figure 1

| Protein  | Residue Range | Sequence                                                      | Residue Range |
|----------|---------------|---------------------------------------------------------------|---------------|
| hBiP     | 324           | RAKFEELNMDLFRSTMKPVQKVLKSDIDEIVLVGGSTRIPKIQQLVKEFFNGKE        | 383           |
| dBiP     | 324           | RAKFEELNLDLFRSTLKPVQKVLKEDADMNKKDVHEIVLVGGSTRIPKVQQLVKDFFGGKE | 383           |
| gBiP     | 331           | RARFEELNNDLFRKTMGPVKKAMEDAGLQKSQIDEIVLVGGSTRIPKVQQLLKDYFDGKE  | 390           |
| Kar2     | 344           | RAKFEELNLDLFRKTLKPVKVLQDSGLEKKDVDDIVLVGGSTRIPKVQQLLESYFDGK    | 403           |
| hHsp70   | 299           | RARFEELCSDLFRSTLEPVEKALRDAKLKDAQIHDIVLVGGSTRIPKVQQLQDFFNGRD   | 358           |
| dHsp70   | 297           | RARFEELCADLFRNTLQPVKALNDAKMDKGQIHDIVLVGGSTRIPKVQSLQDFFHGKN    | 356           |
| gHsp70   | 305           | RARFEELNMDLFRKCMPEVEKCLRDAKMDKSTVHDVVLVGGSTRIPKVQQLQDFFNGKE   | 364           |
| bHsc70   | 299           | RARFEELNADLFRGTLDPVEKALRDAKLKDSQIHDIVLVGGSTRIPKIQQLQDFFNGKE   | 358           |
| Ssa1     | 299           | RARFEELNADLFRGTLDPVEKALRDAKLKDSQIHDIVLVGGSTRIPKIQQLQDFFNGKE   | 358           |
| hmtHsp70 | 348           | RAQFEGIVTDLIRRTIAPCQKAMQDAEVSKSDIGEVILVGGMTRMPKVQQTVDLFGRA    | 406           |
| Ssc1     | 225           | RAQFETLTAPLVKRTVDPVKALKDAGLSTSDISEVLLVGGMSRMPKVVEVTKSLF-GKD   | 383           |
| eDnaK    | 302           | RAKLESLVEDLVNRSIEPLKVALQDAGLSVSDIDVILVGGQTRMPMVQKKVAEFF-GKE   | 360           |
| dsDnaK   | 298           | RAKFEQLADSLINATIEPCRKALKNAGMTASDIDEVILVGGSTRIPAIQDKVKEFF-GKE  | 356           |
| abDnaK   | 301           | RAKLEGLVGDIVARTIEPCKIALKDALGSLTSDISDVILVGGQSRMPLVQKQVQEFF-GRE | 359           |
| laDnaK   | 273           | RAKFDELTSDLVERTVGPTRQALKDAGLSASDIDQVILVGGSTRIPAVQEAITKEL-GKE  | 331           |
| vhDnaK   | 273           | RAKFEELSDDLVERTMVPTRKALSASLSANDIHKVILVGGSTRIPAVQEAIKREI-GQE   | 331           |

| Protein  | Residue Range | Sequence                                                       | Residue Range |
|----------|---------------|----------------------------------------------------------------|---------------|
| hBiP     | 384           | PSRGINPDEAVAYGAAVQAGVLSGD--QDTGDLVLLHVCPLTLGIEITVGGVMTKLI PSNT | 441           |
| dBiP     | 384           | PSRGINPDEAVAYGAAVQAGVLSGE--QDTDAIVLLDNPLTMGIEITVGGVMTKLI PRNT  | 441           |
| gBiP     | 391           | PNKGVNPDEAVAYGAAVQGGILSGEGGDETKDILLLDVAPLTLGIEITVGGVMTKLI PRNT | 450           |
| Kar2     | 404           | ASKGINPDEAVAYGAAVQAGVLSGE--EGVEDIVLLDVNALTGLGIEITGGVMTPLIKRNT  | 461           |
| hHsp70   | 358           | LNKSINPDEAVAYGAAVQAAIILMGDKSENVQDLLLLDVAPLSLGLLETAGGVMTALIKRNS | 418           |
| dHsp70   | 357           | LNLSINPDEAVAYGAAVQAAIILSGDQSGKIQDVLLVDVAPLSLGLLETAGGVMTKLIERN  | 416           |
| gHsp70   | 365           | LCKSINPDEAVAYGAAVQAAIILSGEGNEKVDLDDVTPLSLGLLETAGGVMTVLI PRNT   | 424           |
| bHsc70   | 359           | LNKSINPDEAVAYGAAVQAAIILSGDKSENVQDLLLLDVTPLSLGLLETAGGVMTVLIKRN  | 418           |
| Ssa1     | 359           | LNKSINPDEAVAYGAAVQAAIILSGDKSENVQDLLLLDVTPLSLGLLETAGGVMTVLIKRN  | 418           |
| hmtHsp70 | 407           | PSKAVNPDEAVAIGAAIQGGVLAG---DVTDLVLLDVTPLSLGLLETGGVFTKLIERN     | 462           |
| Ssc1     | 384           | PSKAVNPDEAVAIGAAVQAGVLSG---EVTDLVLLDVTPLSLGLLETGGVFTRLI PRNT   | 439           |
| eDnaK    | 361           | PRKDVNPDEAVAIGAAVQGGVLTG---DVKDVLLDVTPLSLGLLETGGVMTTLIAKNT     | 416           |
| dsDnaK   | 357           | ASKGVNPDEVVAIGAAIQGGVLTG---EVKDVLLDVTPLSLGLLETGGVMTKLIERN      | 412           |
| abDnaK   | 360           | PRKDVNPDEAVAIGAAIQGAVLSG---DKNDVLLDVTPPLTLGIEITMGGVLTPIIEKNT   | 415           |
| laDnaK   | 332           | PHRGVNPDEVVAMGAAIQGGVITG---DVKDVLLDVTPLSLGLLETGGVMTSLIERNT     | 387           |
| vhDnaK   | 332           | PSKGVNPDEVVALGAAIQGGVLTG---DVKDVLLDVTPLSLGLLETGGVFTKLIERN      | 387           |

| Protein  | Residue Range | Sequence                                                    | Residue Range |
|----------|---------------|-------------------------------------------------------------|---------------|
| hBiP     | 442           | VVPTKKSQIFSTASDNQPTVTIKVYEGERPLTKDNHLLGTFDLTGIPAPRGVPOIEVTF | 501           |
| dBiP     | 442           | VIPTKKSQVFSTASDNQHTVTIQVYEGERPMTKDNHLLGKFDLTGIPAPRGIPQIEVFS | 501           |
| gBiP     | 451           | VIPTKKSQVFSTYQDQQTTVSIQVFEGERSLTKDCRLLGKFDLTGIPAPRGTPQIEVTF | 510           |
| Kar2     | 462           | AIPTKKSQIFSTAVDNQPTVMIKVYEGERAMSKDNLLGKFFELTGIPAPRGVPOIEVTF | 521           |
| hHsp70   | 419           | TIPTKQTQIFSTYSDNQPGVLIQVYEGERAMTKDNLLGRFELSGIPAPRGVPOIEVTF  | 478           |
| dHsp70   | 417           | RIPCKQTKTFSTYADNQPGVSIQVYEGERAMTKDNLLGTFDLGIPAPRGVPOIEVTF   | 476           |
| gHsp70   | 425           | TIPTKKEQVFSTYSDNQPGVLIQVYEGERTTRDNLLGKFFELSGIPAPRGVPOITVCF  | 484           |
| bHsc70   | 419           | TIPTKQTQIFSTYSDNQPGVLIQVYEGERAMTKDNLLGKFFELTGIPAPRGVPOIEVTF | 478           |
| Ssa1     | 419           | TIPTKQTQIFSTYSDNQPGVLIQVYEGERAMTKDNLLGKFFELTGIPAPRGVPOIEVTF | 478           |
| hmtHsp70 | 463           | TIPTKKSQVFSTAAAGQTVSIVKQGEREMAGDNKLLGQFTLIGIPAPRGVPOIEVTF   | 522           |
| Ssc1     | 440           | TIPTKKSQIFSTAAAGQTSVEIRVQGERELVRDNKLLGNFTLAGIPAPRGVPOIEVTF  | 499           |
| eDnaK    | 417           | TIPTKKSQVFSTAEQNSAVTIHVLQGERKRAADNKSLGQFNLDGINPAPRGMPQIEVTF | 476           |
| dsDnaK   | 413           | TIPTKKSQVFSTAEQNSAVTIHVLQGERPIASGNKTIGRFHLDGIPAPRGIPQIEVTF  | 472           |
| abDnaK   | 416           | TIPTKKSQVFSTAAADNPVAVISVYQGERKMAQQNKLGNFQLDGIPAPRGVPOIEVFS  | 475           |
| laDnaK   | 388           | TIPTKKSQVFSTAAADNPVAVIHLVQGERPMAKDNKTLGRFQLADIPAPRGVPOIEVFS | 447           |
| vhDnaK   | 388           | TIPTKKSQVFSTAAADNPVAVIHLVQGEREMADNKTLGRFQLTDIPAPRGVPOIEVFS  | 447           |

# Supplementary Figure 1

|          |     |                                                                     |     |
|----------|-----|---------------------------------------------------------------------|-----|
|          |     |                                                                     |     |
| hBiP     | 502 | <b>EIDVNGILRVTAEDKGTGNKNKIIITINDQNRLTPEEIERMVNDAEKFAEDDKLKERIDT</b> | 561 |
| dBIP     | 502 | EIDANGILQVSAEDKGTGNKEKIVITINDQNRLTPEDIDRMIRDAEKFADEDKLLKERVES       | 561 |
| gBiP     | 511 | EVDANGILNVKAEDKGTGKSEKIIITINDKGRLSQEEIERMVREAEEFAEDDKKVKERIDA       | 570 |
| Kar2     | 522 | ALDANGILKVSATDKGTGKSESIIITINDKGRLLTQEEIDRMVVEAEKFASEDASIKAKVES      | 581 |
| hHsp70   | 479 | DIDANGILNVTATDKSTGKANKIITITNDKGRLSKEEIERMVQEAKEYKAEDVQREVRSA        | 538 |
| dHsp70   | 477 | DLDANGILNVSAREMSTGKAKNIIITINDKGRLSQAEIDRMVNEAEKYADEDEKHRQRITS       | 536 |
| gHsp70   | 485 | DIDANGILNVSAREMSTGKAKNIIITINDKGRLSKEEIEKMQEAKEYKSEDEEHKKKVEA        | 544 |
| bHsc70   | 479 | DIDANGILNVSAREMSTGKAKNIIITINDKGRLSKEDIERMVQEAKEYKAEDKQDRKVSS        | 538 |
| Ssa1     | 479 | DIDANGILNVSAREMSTGKAKNIIITINDKGRLSKEDIERMVQEAKEYKAEDKQDRKVSS        | 538 |
| hmtHsp70 | 523 | DIDANGIVHVSAREMSTGKAKNIIITINDKGRLSKEDIERMVQEAKEYKAEDRRKKERVEA       | 581 |
| Ssc1     | 500 | DIDADGIINVSARDKATNKDSSITVAGSSG-LSENEIEQMVNDAEKFKSQDEARKQAIET        | 558 |
| eDnaK    | 477 | DIDADGILHVSAREMSTGKAKNIIITINDKGRLSKEDIERMVQEAKEYKAEDRRKKERVEA       | 535 |
| dsDnaK   | 473 | DIDANGILHVHAKDKATGKSQSIRIEASSG-LSDEEINRMKSEAEANAEDRKKAKETADK        | 531 |
| abDnaK   | 476 | DINADGILKVSAREMSTGKAKNIIITINDKGRLSKEDIERMVQEAKEYKAEDRKKAKETADK      | 534 |
| laDnaK   | 448 | DIDKNGIVTVRAKDLGTGKEQNIVIKSSSG-LTDEEIDRMVKDAEANAEDRKKAKETADK        | 506 |
| vhDnaK   | 448 | DIDANGIVNVRADMGTNKEQSITIKSSSG-LSDEEVDKRVKAEANAEDRKKAKETADK          | 506 |

|          |     |                                                                   |     |
|----------|-----|-------------------------------------------------------------------|-----|
|          |     |                                                                   |     |
| hBiP     | 562 | <b>RNELESYAYSLKNQIGDKKLGKLSSEDKETMEKAVEEKIEWLES---HQDADIEDFKA</b> | 618 |
| dBIP     | 562 | RNELESYAYSLKNQIGDKKLGKLSSEDKKLESAIDESIKWLEQ---NPDADPEEYKK         | 618 |
| gBiP     | 571 | RNSLETYIYNMKNQINDKDKLADKLESEDEKEKVVETAVKEALEWLDD---NQSAEKEDYEE    | 627 |
| Kar2     | 582 | RNKLENYAHSLSKNQVNGDLGE--KLEEDKETLLDAANDVLEWLDD---NFETAIAEDFDE     | 637 |
| hHsp70   | 539 | KNALESYAFNMKSAVEDEGLKG-KISEADKKKVLKDCQEVISWLDA---NTLAEKDEFEH      | 594 |
| dHsp70   | 537 | RNALESYVFNKQAVEQAPAG--KLDEADKNSVLDKCNDRIRWLDS---NTTAEKEEFDH       | 591 |
| gHsp70   | 545 | KNALESYAFNMKSAVEDEGLKG-KISEADKKKVLKDCQEVISWLDA---NTLAEKDEFEH      | 600 |
| bHsc70   | 539 | KNSLESYAFNMKATVEDEKLQK-KINDEKQKILDKCNEIINWLDK---NQTAKEEFEH        | 594 |
| Ssa1     | 539 | KNSLESYAFNMKATVEDEKLQK-KINDEKQKILDKCNEIINWLDK---NQTAKEEFEH        | 594 |
| hmtHsp70 | 582 | VNMAEGIIHDTETKMEEFK---QLPADECNKLKEEISKMRELLAR---KDSETGENIRQ       | 635 |
| Ssc1     | 559 | ANKADQLANDTENSLEFEG---KVDKAEAQKVRDQITSLKELVARVQGGEEVNAEELKT       | 615 |
| eDnaK    | 536 | RNQGDLHLHSTRKQVEEAGD---KLPADDKTAIESALTALETALKG-----EDKAAIEA       | 586 |
| dsDnaK   | 532 | INQADSLIFQTEKQLKEYGD---KLPADKKGPIEDALKKLEAHAS-----KDLAAIEA        | 582 |
| abDnaK   | 535 | RNEADALISSSNKAVKDLGD---KVTEDEKTAVNTAVSELEAATKE-----NDVEAIEA       | 585 |
| laDnaK   | 507 | RNNADQLIFTVDKTLKELEG---KVDADDEVKKAETARDELQEAALKG-----EDFDAIKE     | 557 |
| vhDnaK   | 507 | RNEADQLIFTTDKTIKDLGE---KVSDEEKEKAKEAKEELKSALES-----DDQEIQIE       | 557 |

|          |     |                                                               |     |
|----------|-----|---------------------------------------------------------------|-----|
|          |     |                                                               |     |
| hBiP     | 619 | <b>KKKELEEIVQPIISK</b> LYGSAGPPPTGEEDTAE-----KDEL             | 654 |
| dBIP     | 619 | QKLDLEAIVQPVIAKLYQAGGAPPPEGDDADL-----KDEL                     | 656 |
| gBiP     | 628 | KLKEVEAVCNPIITAVYQRSGGAPGGGSTEEDDDS-----HDEL                  | 666 |
| Kar2     | 638 | KFESLSKVAYPIITSKLYGGADGSGAADYDEDEDGDDYFEHDEL                  | 682 |
| hHsp70   | 595 | KRKELEQVCNPIISGLYQAGGP-GPGGFQAQGPKGSGSGSPTIEEVD               | 641 |
| dHsp70   | 592 | KLEELTRHCSPIIMTKMHQQGAGAGAGGPGANCGQQAGGFGGYSGPTVEEVD          | 642 |
| gHsp70   | 601 | KMKELENMCNPIIAKMYQAGGEPAGKAGEAPPAGGSGAGPKIEEVD                | 648 |
| bHsc70   | 595 | QQKELEKVCNPIITKLYQSAGGMPGGMPGGMPGGFPGGGAPPSSGASSGPTIEEVD      | 650 |
| Ssa1     | 595 | QQKELEKVCNPIITKLYQSAGGMPGGMPGGMPGGFPGGGAPPSSGASSGPTIEEVD      | 650 |
| hmtHsp70 | 636 | AASSLQOASLKLFEFEMAYKMASEREGSGSSGTGEQKEDQKEEKQ                 | 679 |
| Ssc1     | 616 | KTEELQTSMSKLFQLYKNSNNNNNNNGNNAESGETKQ                         | 654 |
| eDnaK    | 587 | KMQELAQVSQKLMEIAQQQHAQQOTAGADASANNAKDDVVDVDAEFEEVKDKK         | 638 |
| dsDnaK   | 583 | AMNELNTVFAASQEMYNASQAQGGAGPDPDAGQQAGPQDQPKDDGEVTDVDFEEVK      | 637 |
| abDnaK   | 586 | KTEALQNIILMPITQRAYEQAQAGGAEQFDPNFAFQGGDAGQQKADDGVVDAEFTEVKDDK | 646 |
| laDnaK   | 558 | KSDALNEIVQSLSVKLYEQAAAAQQAQGENPEANAADGSEDVVDADFEEINDDDKKEDK   | 615 |
| vhDnaK   | 558 | KKEALEEQVQQLSVKMYEQMQQEAQAQQQEDQGSDDVVDADYQEVDEEKDEKDNK       | 613 |

## Supplementary Figure 1

### Supplementary Figure 1. Structure-based sequence alignment of representative Hsp70s.

The amino acid sequence of human BiP (hBiP) is aligned with the sequences of a number of selected Hsp70s from both eukaryotes (different cellular compartments) and prokaryotes. The BiP construct used in crystallization is from residue 25 to 633, and all the residues in the construct (highlighted in red) are ordered in both protomers. L<sub>3,4</sub>, which is mutated to VGG (L<sub>3,4</sub>'), is highlighted in blue. Elements of secondary structure in the BiP-ATP2 structure are specified by cylinders for helices and arrows for strands and labeled. The coloring of structural elements is: NBD (blue), Linker (purple), SBD $\beta$  (green) and SBD $\alpha$  (red). The highly conserved Gly425, Gly430 and Gly431 are highlighted in purple. The first four sequences are Hsp70s from endoplasmic reticulum (ER); the next 5 sequences (names in red) are Hsp70s from eukaryotic cytosol; the following two sequences (names in green) are Hsp70s from mitochondria; and the last five sequences are Hsp70s from prokaryotes (names in blue). hBiP: human ER Hsp70; dBiP: *Drosophila melanogaster* ER Hsp70; gBiP: *Gossypium hirsutum* ER Hsp70; Kar2: *S. cerevisiae* ER Hsp70; hHsp70: human Hsp70; dHsp70: *Drosophila melanogaster* Hsp70; gHsp70: *Gossypium hirsutum* Hsp70; bHsc70: bovine Hsc70; Ssa1: *S. cerevisiae* Hsp70; hmtHsp70: human mitochondrial Hsp70; bmtHsp70: bovine mitochondrial Hsp70; Ssc1: *S. cerevisiae* mitochondrial Hsp70; eDnaK: *Escherichia coli* Hsp70 (gram-negative); dsDnaK: *Draconibacterium* sp. Hsp70 (gram-negative); abDnaK: *Acinetobacter baumannii* Hsp70 (gram-negative); laDnaK: *Listeria aquatica* Hsp70 (gram-positive); vhDnaK: *Virgibacillus halodenitrificans* Hsp70 (gram-positive).



## Supplementary Figure 2

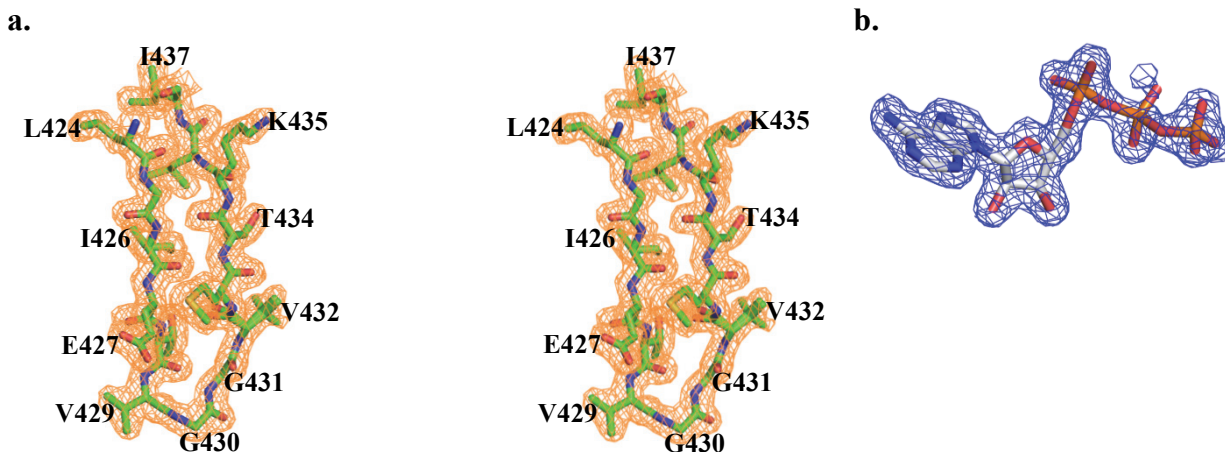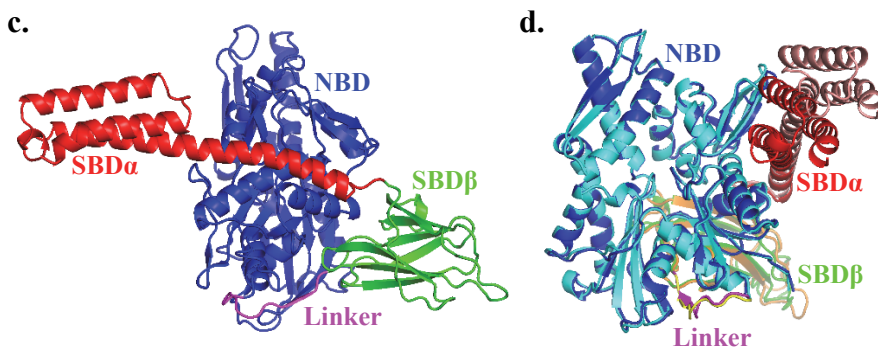

**e.**

| rmsd (Å)  | BiP-ATP2/BiP-ATP | BiP-ATP2/DnaK-ATP |
|-----------|------------------|-------------------|
| NBD       | 0.513            | 0.920             |
| SBDβ      | 2.337            | 2.618             |
| SBDβ-core | 0.591            | 0.615             |
| SBDα      | 1.076            | 2.174             |

SBDβ-core: SBDβ excluding L<sub>1,2</sub>, L<sub>3,4</sub>, L<sub>4,5</sub>, L<sub>5,6</sub>, and β8.

**f.**

|      | $k_{cat}$ ( $\times 10^{-3}$ min <sup>-1</sup> ) |
|------|--------------------------------------------------|
| - Pi | 12.92±0.92                                       |
| + Pi | 2.55±0.36                                        |

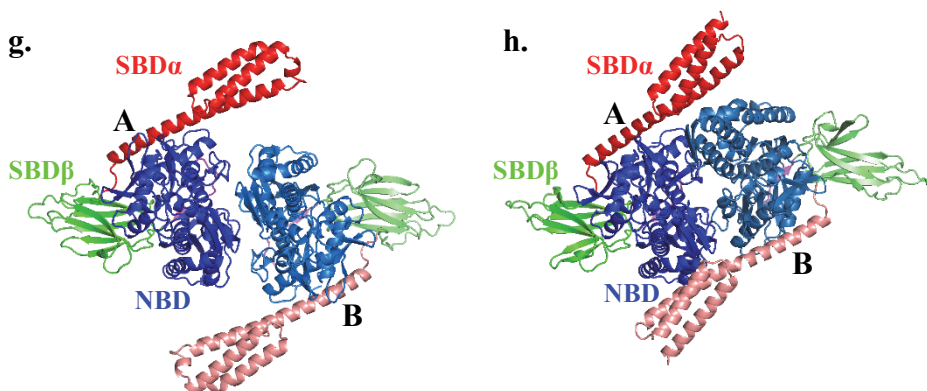

## Supplementary Figure 2

### Supplementary Figure 2. The BiP-ATP2 structure and structural comparison.

**a-b**, Electron-density maps for  $L_{1,2}$  (**a**, stereo image) and ATP (**b**) of the BiP-ATP2 structure. 2Fo-Fc maps (contoured at  $1\sigma$ ) were shown as meshes.  $L_{1,2}$  and ATP were drawn as sticks.

**c**, The BiP-ATP2 structure. Orthogonal view of Fig. 1**b**.

**d**, Structural comparison of BiP-ATP2 with BiP-ATP (PDB code: 5E84). Orthogonal view of Fig. 1**c**.

**e**,  $C\alpha$  root-mean-square deviation (rmsd) between the Hsp70-ATP structures. NBD and SBD $\beta$ -core have the smallest rmsd.

**f**, Phosphate reduces the ATPase activity of BiP. Single-turnover ATPase assay was carried with BiP protein in the presence of 100 mM phosphate (+ Pi), and the catalytic constant ( $k_{cat}$ ) was calculated after fitting the data using Prism. The ATPase activity in the absence of phosphate (- Pi) was used as a control.

**g-h**, Ribbon diagrams of BiP-ATP2 dimer (**g**) and DnaK-ATP-dimer (**h**, PDB code: 4JNE). Protomer As from BiP-ATP2 and DnaK-ATP are superimposed. The domain coloring for protomer A is the same as Fig. 1**b**, and the domain coloring for protomer B is: NBD (light blue), SBD $\beta$  (light green), SBD $\alpha$  (pink), and inter-domain linker (magenta).

## Supplementary Figure 3

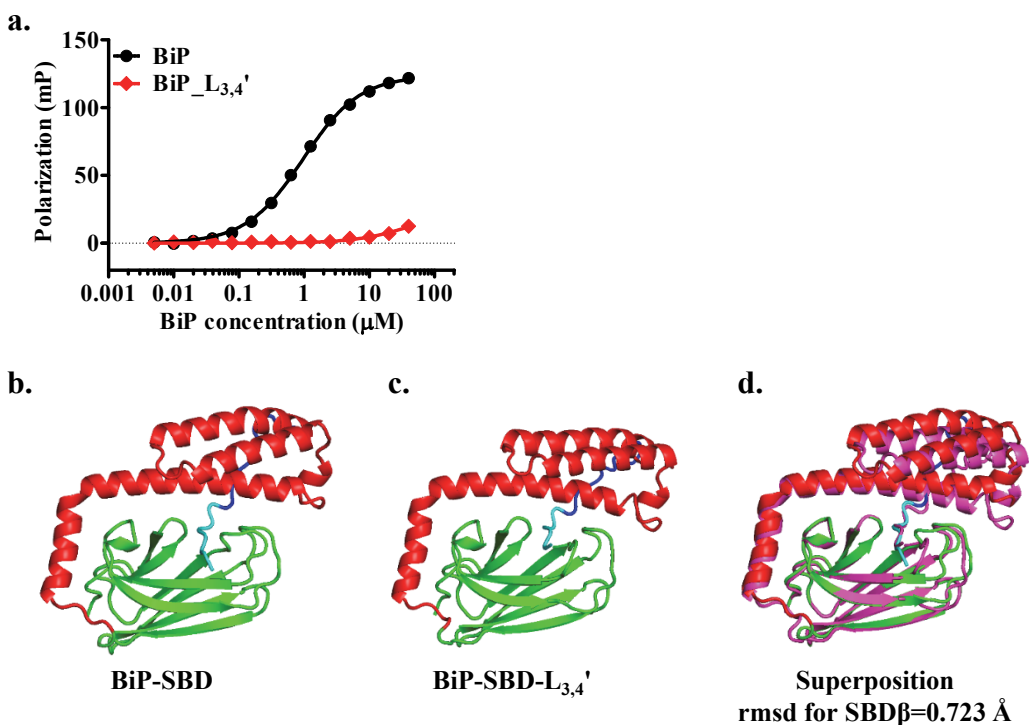

### Supplementary Figure 3. The $L_{3,4}'$ modification in BiP significantly compromises peptide substrate binding but has little structural impact in the isolated domain structure.

**a**, Peptide substrate binding to BiP proteins using fluorescence polarization. The NR peptide was labeled with fluorescein at the N-terminus. This F-NR peptide was incubated with serial dilutions of BiP proteins. After binding reached equilibrium, fluorescence polarization was measured and fitted to one-site binding equation. The dissociation constant ( $K_d$ ) for the WT BiP is 0.95  $\mu\text{M}$ , consistent with published results. The binding for BiP- $L_{3,4}'$  protein was drastically reduced.

**b-d**, Structural comparison of the isolated SBD domain of BiP. The structures of isolated SBD from WT BiP (**b**, PDB code: 5E85) and BiP- $L_{3,4}'$  (**c**, PDB code: 5E86) were superimposed based on the C $\alpha$ s of SBD $\beta$ . The coloring for both structures is: SBD $\beta$  (green), SBD $\alpha$  (red), linked NR (cyan), and the Tev linker between SBD and NR peptide (blue). **d** is the superposition of the two structures. The WT SBD structure has the same color code as in **b** and the SBD- $L_{3,4}'$  is colored in purple. The rmsd for the SBD $\beta$  is 0.723 Å.



## Supplementary Figure 4

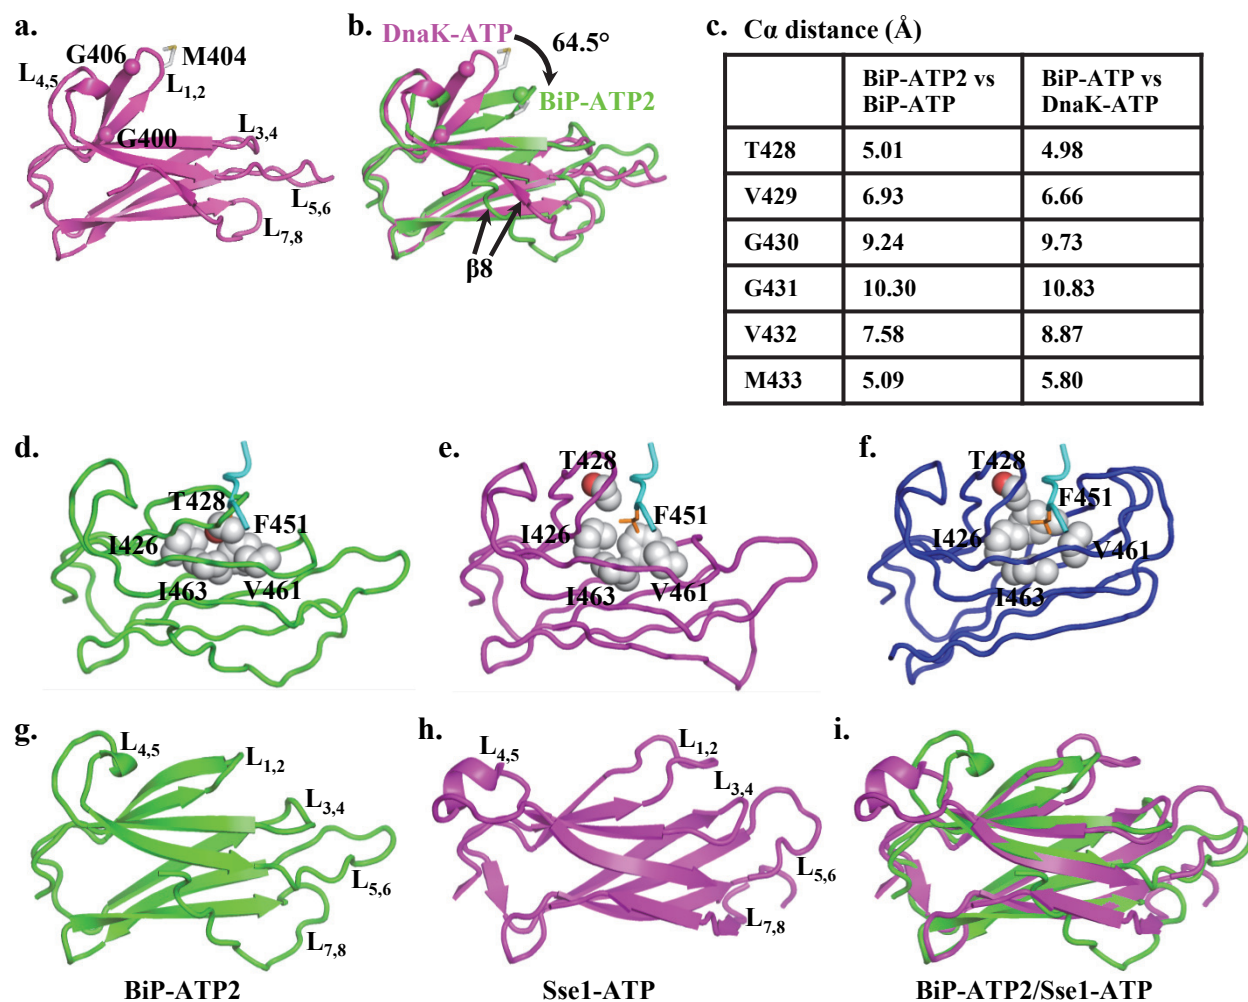

### Supplementary Figure 4. The conformations of the polypeptide-binding pocket.

**a,** Ribbon diagram of the SBD $\beta$  from the DnaK-ATP structure (PDB code: 4JNE). The C $\alpha$  atoms of Gly400 and Gly406 are shown as balls.

**b,** Superposition of the SBD $\beta$ s from BiP-ATP2 (green) and DnaK-ATP (purple). The structures were superimposed based on the C $\alpha$  atoms of the SBD $\beta$ -core. The C $\alpha$  atoms of Gly400 and Gly406 are shown as balls. The rotation of L<sub>1,2</sub> between BiP-ATP2 and DnaK-ATP is labeled.

**c,** Distances between the C $\alpha$  atoms in the  $\beta$ 1-L<sub>1,2</sub>- $\beta$ 2 segment from the BiP-ATP2, BiP-ATP and DnaK-ATP structures.

**d-f,** The polypeptide-binding pockets in BiP-ATP2 (**d**), BiP-ATP (**e**, PDB code: 5E84), and isolated BiP SBD (**f**, PDB code: 5E85). SBD $\beta$ s are shown as worm representation. The NR peptide bound to the isolated SBD is shown in cyan with the side chain of the central leucine, Leu4, highlighted in yellow. SBD $\beta$  side chains that make van der Waals contacts with Leu4 in the isolated BiP SBD structure are shown as sphere drawings. Since the polypeptide-binding pocket is fully closed, these residues pack against each other to exclude the binding of the NR peptide.

**g-i,** Structural comparison of the SBD $\beta$ s from BiP-ATP2 (**g**) and Sse1-ATP (**h**, PDB code: 2QXL). **i** is the superposition of **g** and **h**. The SBD $\beta$ s are superimposed based on C $\alpha$  atoms. Except L<sub>4,5</sub> and  $\beta$ 8, the two structures aligned well (rmsd: 1.511 Å), especially the peptide-binding loops. The disordered region in L<sub>7,8</sub> of Sse1-ATP is not shown.

# Supplementary Figure 5

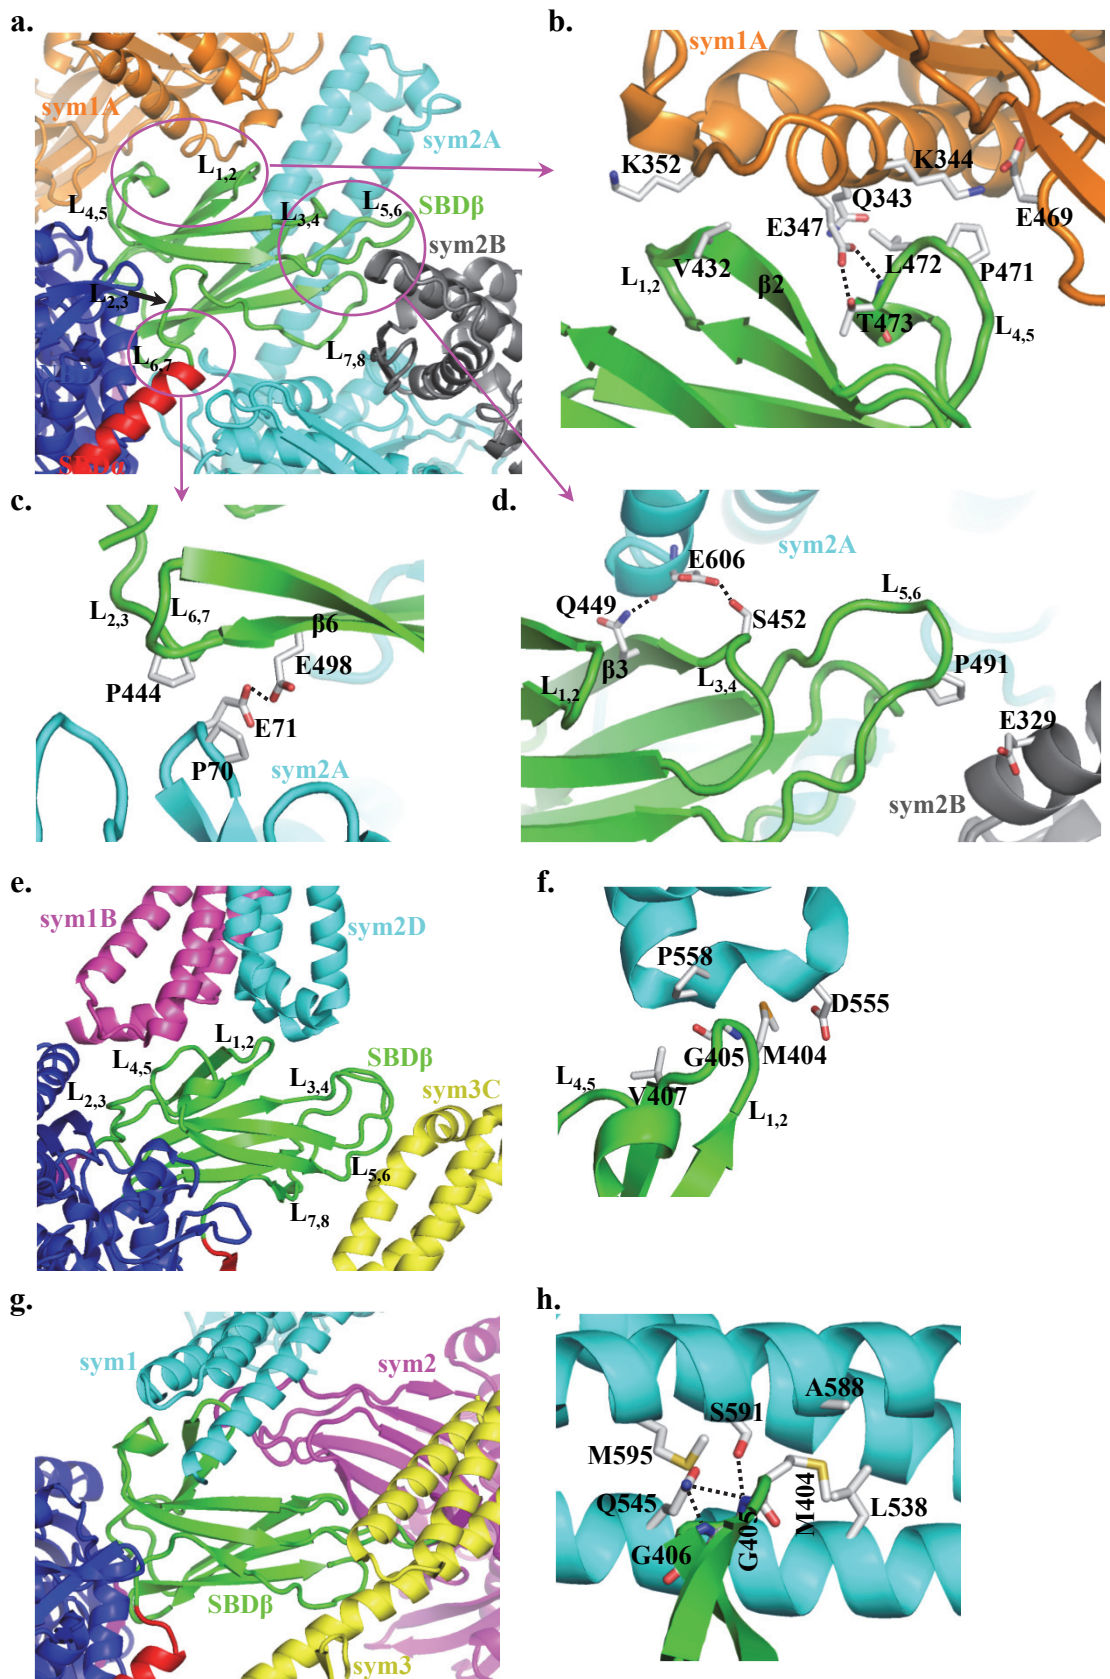

## Supplementary Figure 5

### Supplementary Figure 5. Crystal contacts surrounding the SBD $\beta$ region.

**a-d**, Crystal contacts in the BiP-ATP2 structure. **a**, Overall crystal contacts surrounding the SBD $\beta$ . Only protomer A was shown (NBD: blue; SBD $\beta$ : green; and SBD $\alpha$ : red). Three molecules from two symmetry mates form crystal contacts with SBD $\beta$ : protomer A from symmetry mate 1 (sym1A, orange), and both protomers from symmetry mate 2 (sym2A and sym2B, cyan and grey, respectively). **b**, Details of the crystal contacts formed between SBD $\beta$  and sym1A. L<sub>1,2</sub> and L<sub>4,5</sub> of SBD $\beta$  are involved in these crystal contacts. A hydrophobic contact was formed between Val432 (in L<sub>1,2</sub>) and Lys352 (sym1A). Two hydrogen bonds were formed between the side-chain of Glu347 (sym1A) and Thr473 in L<sub>4,5</sub> (both side-chain and main-chain). There are a number of hydrophobic contacts formed between two residues on L<sub>4,5</sub> (Lys472 and Pro471) and three residues on sym1A (Gln343, Lys344 and Glu469). **c**, Details of the crystal contacts formed between SBD $\beta$  (the L<sub>2,3</sub> and L<sub>6,7</sub> region) and sym2A. Hydrophobic contacts were formed between the side-chains of Pro444 (in L<sub>2,3</sub>) and Pro70 and Glu71 from sym2A. Moreover, a hydrogen bond was formed between Glu498 (in  $\beta$ 6) and Glu71 in sym2A. **d**, Details of the crystal contacts formed between SBD $\beta$  and sym2A and sym2B around the L<sub>3,4</sub> and L<sub>5,6</sub> region. There are two hydrogen bonds: between Ser452 in L<sub>3,4</sub> and Glu606 of Sym2A, and between Gln449 in  $\beta$ 3 and Glu606 of Sym2A. Hydrophobic contacts were formed between Pro491 in L<sub>5,6</sub> and side-chain of Glu329 from sym2B.

**e-f**, Crystal contacts around the peptide-binding loops in the DnaK-ATP structure solved by the Mayer's group (PDB code: 4B9Q). Only protomer A was shown (NBD: blue; SBD $\beta$ : green; and SBD $\alpha$ : red). **e**, Overall crystal contacts around the peptide-binding loops. Three symmetry mates form crystal contacts around the peptide-binding loops: sym1B (purple), sym2D (cyan), and sym3C (yellow). **f**, L<sub>1,2</sub> forms crystal contacts with symmetry mate sym2D. This crystal contact features a number of hydrophobic interactions between the side-chain of Met404 in L<sub>1,2</sub> and side-chains of both Asp555 and Pro558 (sym2D), between the main-chain of Gly405 in L<sub>1,2</sub> and side-chain of Pro558 (sym2D), and between the side-chains of Val407 in L<sub>1,2</sub>- $\beta$ 2 junction and Pro558 (sym2D).

**g-h**, Crystal contacts around the peptide-binding loops in the DnaK-ATP structure solved by our group (PDB code: 4JNE). Only protomer A was shown (NBD: blue; SBD $\beta$ : green; and SBD $\alpha$ : red). **g**, Overall crystal contacts around the peptide-binding loops. Three symmetry mates form crystal contacts around the peptide-binding loops: sym1 (purple), sym2 (cyan), and sym3 (yellow). **h**, The crystal contacts formed between L<sub>1,2</sub> and symmetry mate sym1. A number of hydrophobic interactions and hydrogen bonds are formed on these crystal contacts. The hydrogen bonds are labeled as dotted lines. The side-chain of Met404 in L<sub>1,2</sub> forms hydrophobic contacts with the side-chains of Leu538, Ala588 and Ser591 on sym1. The main-chain C $\alpha$  of Gly406 in L<sub>1,2</sub> forms hydrophobic contact with Met595 on sym1.

## Supplementary Figure 6

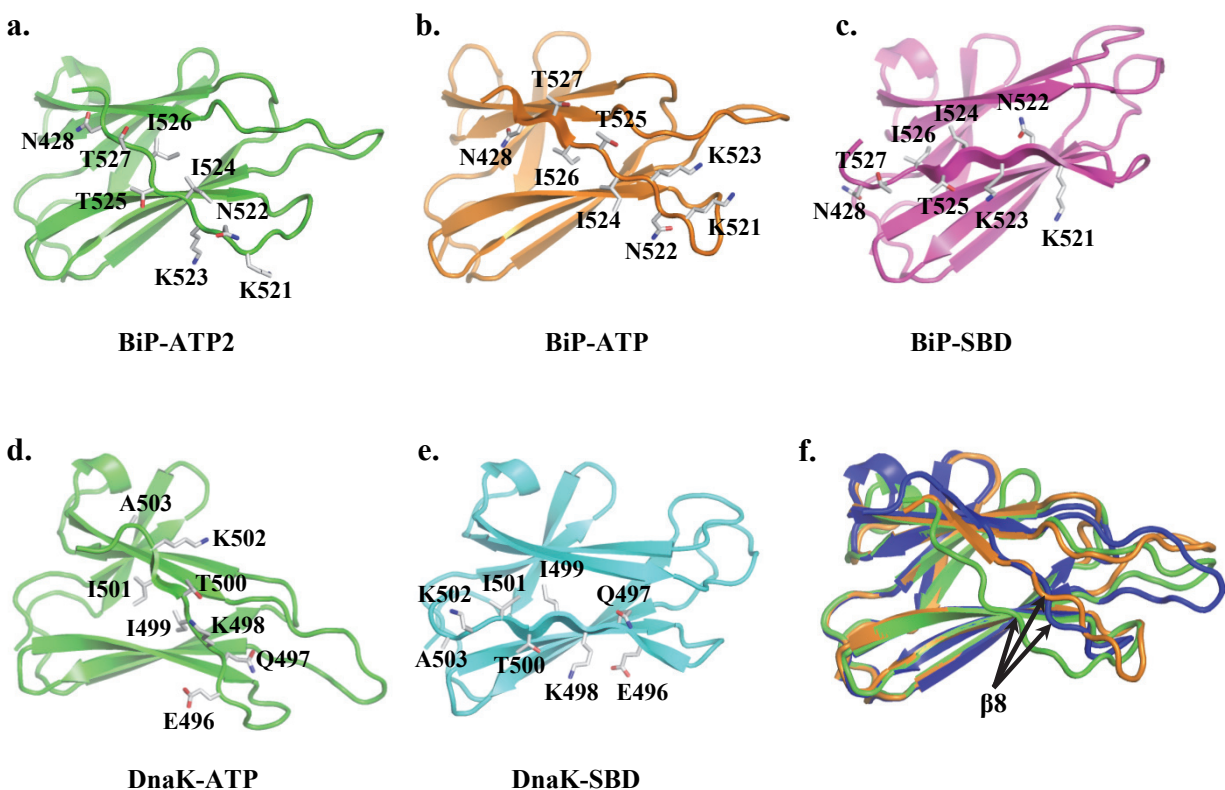

### Supplementary Figure 6. The conformation of $\beta$ 8.

**a-e,** The SBD $\beta$ s from BiP-ATP2 (**a**), BiP-ATP (**b**, PDB code: 5E84), BiP-SBD (**c**, PDB code: 5E85), DnaK-ATP (**d**, PDB code: 4JNE), and DnaK-SBD (**e**, PDB code: 1DKX) are drawn in ribbon diagram. Side chains of  $\beta$ 8 are highlighted in stick representation. The  $\beta$ 8 in BiP-ATP2 has similar side-chain orientations as those in the isolated BiP-SBD; whereas the side-chain orientations of  $\beta$ 8 in BiP-ATP are flipped. The side-chain orientations of  $\beta$ 8 in the isolated DnaK SBD are similar to those of the isolated BiP SBD. Interestingly, the first two residues at the N-terminal end of  $\beta$ 8 in DnaK-ATP have similar side-chain orientations as the isolated SBD structures, whereas for the rest of  $\beta$ 8 starting from the third residue, the side-chain orientations are flipped as those in BiP-ATP. Thus, the side-chain orientations of  $\beta$ 8 in DnaK-ATP seem to be a hybrid between BiP-ATP and BiP-ATP2.

**f,** Superposition of SBD $\beta$ s from BiP-ATP2 (green), BiP-ATP (orange) and DnaK-ATP (blue). The SBD $\beta$ s were superimposed based on the C $\alpha$  atoms of SBD $\beta$ -core.  $\beta$ 8 is indicated by arrows.

## Supplementary Figure 7

a.

| BiP proteins           | $k_{\text{cat}}$ ( $\times 10^{-3} \text{ min}^{-1}$ ) | $K_d$ ( $\mu\text{M}$ ) |
|------------------------|--------------------------------------------------------|-------------------------|
| WT                     | 12.04 $\pm$ 0.80                                       | 0.91 $\pm$ 0.042        |
| C41A/C420A             | 12.46 $\pm$ 0.43                                       | 0.85 $\pm$ 0.012        |
| C41A/C420A/V429C       | 10.47 $\pm$ 0.74                                       | 0.82 $\pm$ 0.026        |
| C41A/C420A/V429C/T462C | 9.11 $\pm$ 1.38                                        | 0.61 $\pm$ 0.023        |

b.

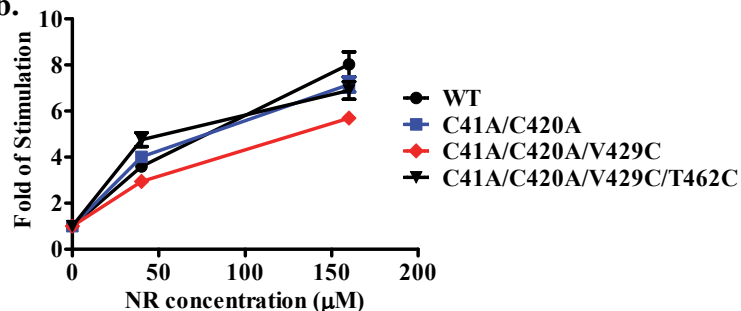

**Supplementary Figure 7. The cysteine modifications used in the FRET and EPR analysis have little influence on BiP's biochemical activities.**

**a.** The intrinsic ATPase and peptide-binding activities of the site-directed cysteine mutations in BiP. The single-turnover ATPase assay was carried out at 20°C, and the catalytic constants ( $k_{\text{cat}}$ ) were calculated after fitting the data using Prism. Peptide substrate binding affinities were assayed using fluorescence polarization with the NR peptide, and the dissociation constants ( $K_d$ ) were calculated by fitting one-site binding equation using Prism.

**b.** The allosteric coupling in BiP proteins was analyzed using the NR peptide stimulation on the ATPase activity. The intrinsic ATPase activities were set as 1. Fold of stimulation was plotted.



## Supplementary Figure 8

| BiP         | BiP-ATP2      |             | BiP-ATP       |             | BiP-SBD       |             | DnaK        | DnaK-ATP      |             | DnaK-SBD      |             | Sse1        | Sse1-ATP      |            |
|-------------|---------------|-------------|---------------|-------------|---------------|-------------|-------------|---------------|-------------|---------------|-------------|-------------|---------------|------------|
|             | $\varphi$ (°) | $\psi$ (°)  | $\varphi$ (°) | $\psi$ (°)  | $\varphi$ (°) | $\psi$ (°)  |             | $\varphi$ (°) | $\psi$ (°)  | $\varphi$ (°) | $\psi$ (°)  |             | $\varphi$ (°) | $\psi$ (°) |
| T423        | -63           | 130         | -58           | 133         | -66           | 132         | S398        | -68           | 136         | -71           | 147         | S401        | -74           | 133        |
| L424        | -101          | 134         | -100          | 148         | -107          | 143         | L399        | -99           | 125         | -121          | 136         | V402        | -123          | 124        |
| <b>G425</b> | <b>-136</b>   | <b>164</b>  | <b>-154</b>   | <b>-176</b> | <b>-170</b>   | <b>-166</b> | <b>G400</b> | <b>-142</b>   | <b>-178</b> | <b>-168</b>   | <b>-161</b> | <b>S403</b> | <b>-106</b>   | <b>153</b> |
| I426        | -126          | 151         | -128          | 155         | -128          | 162         | I401        | -134          | 154         | -134          | 163         | Y404        | -117          | 141        |
| E427        | -120          | 112         | -77           | 137         | -86           | 127         | E402        | -83           | 116         | -83           | 129         | S405        | -124          | 162        |
| T428        | -92           | 120         | -134          | 159         | -108          | 177         | T403        | -108          | 166         | -116          | 173         | W406        | -155          | 167        |
| V429        | -62           | 125         | -26           | 130         | -55           | 126         | M404        | -43           | 134         | -50           | 124         | D407        | -62           | 130        |
| G430        | 72            | 14          | 87            | -137        | 104           | 11          | G405        | 102           | -4          | 110           | -9          |             |               |            |
| <b>G431</b> | <b>-134</b>   | <b>-158</b> | <b>-140</b>   | <b>66</b>   | <b>64</b>     | <b>43</b>   | <b>G406</b> | <b>75</b>     | <b>20</b>   | <b>76</b>     | <b>34</b>   |             |               |            |
| V432        | -83           | 153         | -96           | 130         | -99           | 124         | V407        | -86           | 154         | -106          | 147         | D414        | -122          | 31         |
| M433        | -109          | 131         | -77           | 88          | -73           | 117         | M408        | -90           | 172         | -89           | 131         | H415        | -170          | 137        |
| T434        | -154          | 146         | -81           | 105         | -112          | 117         | T409        | -109          | 118         | -112          | 122         | M416        | -172          | 132        |
| K435        | -64           | 143         | -58           | 146         | -65           | 130         | T410        | -76           | 132         | -83           | 130         | E417        | -74           | 134        |
| L436        | -120          | -55         | -132          | -53         | -111          | -56         | L411        | -104          | -41         | -101          | -41         | V418        | -119          | -51        |
| I437        | -134          | 112         | -128          | 113         | -114          | 112         | I412        | -133          | 116         | -121          | 118         | F419        | -117          | 100        |

**Supplementary Figure 8. Backbone conformation of the  $\beta$ 1-L<sub>1,2</sub>- $\beta$ 2 segment in Hsp70 structures.** The  $\psi$  and  $\varphi$  angles of Gly425 and Gly431 are highlighted in red.



## Supplementary Figure 9

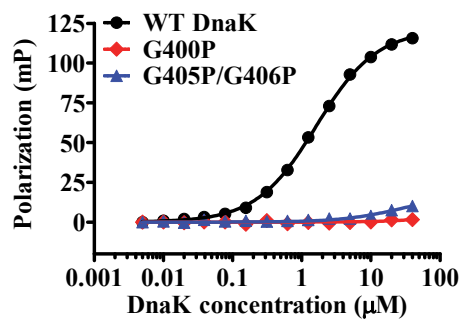

**Supplementary Figure 9. The G400P and G405P/G406P mutations drastically reduced the peptide-binding activity of DnaK.** The fluorescence polarization assay for peptide binding activity was carried out on the DnaK proteins in the same way as in Fig. 5b.

## Supplementary Figure 10

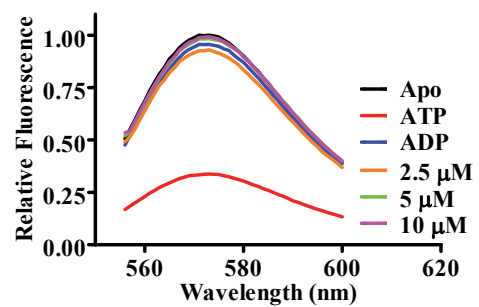

**Supplementary Figure 10. ERdj3 has little effect on the fluorescence intensity of the TMR-labeled BiP in the presence of ADP.** Assay was carried out essentially the same way as in Fig. 6a except that ADP was added in place of ATP.

# Supplementary Figure 11

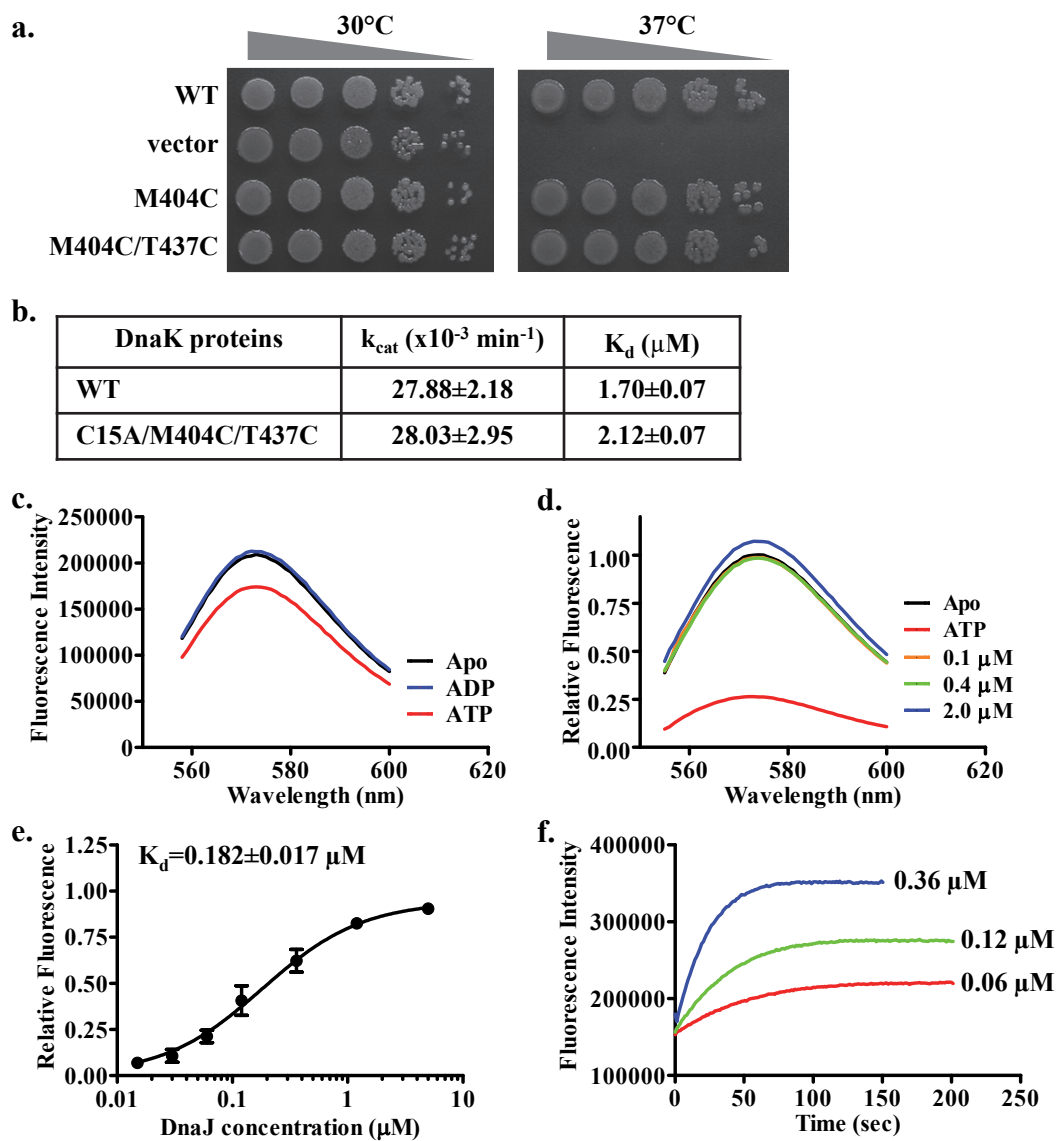

## Supplementary Figure 11

### Supplementary Figure 11. Conserved dynamics of $L_{1,2}$ in DnaK.

**a,** Neither M404C nor T437C modification has appreciable impact on the *in vivo* function of DnaK. Growth test of DnaK mutants in Hsp70-deficient *E.coli* was carried out. Serial dilutions of fresh cultures from fresh transformants were spotted onto plates and incubated at 37 °C with a 30 °C duplicate plate as growth control. WT DnaK and empty vector were used as positive and negative controls, respectively.

**b,** Both the intrinsic ATPase and peptide-binding activities of DnaK are largely unaffected by the M404C and T437C modifications. Assays were performed at room-temperature. For the peptide binding activity, fluorescence polarization assay with the model peptide NR was used and dissociation constants ( $K_d$ ) were calculated. Single-turnover ATPase assay was used to determine the catalytic constants ( $k_{cat}$ ).

**c,** The G400P mutation almost abolished the ATP-induced quenching of the TMR-labeled DnaK's fluorescence. Fluorescence emission spectra were collected in the same way as in Fig. 7a.

**d,** DnaJ has little influence on the fluorescence of the TMR-labeled DnaK in the absence of ATP. Assay was carried out essentially the same way as in Fig. 7c except that ATP was not included.

**e,** Dissociate constant ( $K_d$ ) of DnaJ for DnaK in the FRET assay. Relative fluorescence was calculated by setting the fluorescence intensities of Apo and ATP alone at 573 nm (the peak emission) as 1 and 0, respectively.

**f,** The kinetics of DnaJ-induced opening of  $L_{1,2}$ . Assays were performed on DnaJ and the TMR-labeled DnaK in essentially the same way as in Fig. 6c. The concentrations of DnaJ were labeled on the right.
